# Supplementary material
Source: HighWire-hosted journal article supplement (https://qdcxjkg.com/highwire/filestream/114242/field_highwire_adjunct_files/0/supplementary_figures.pdf)

FIGURE S1

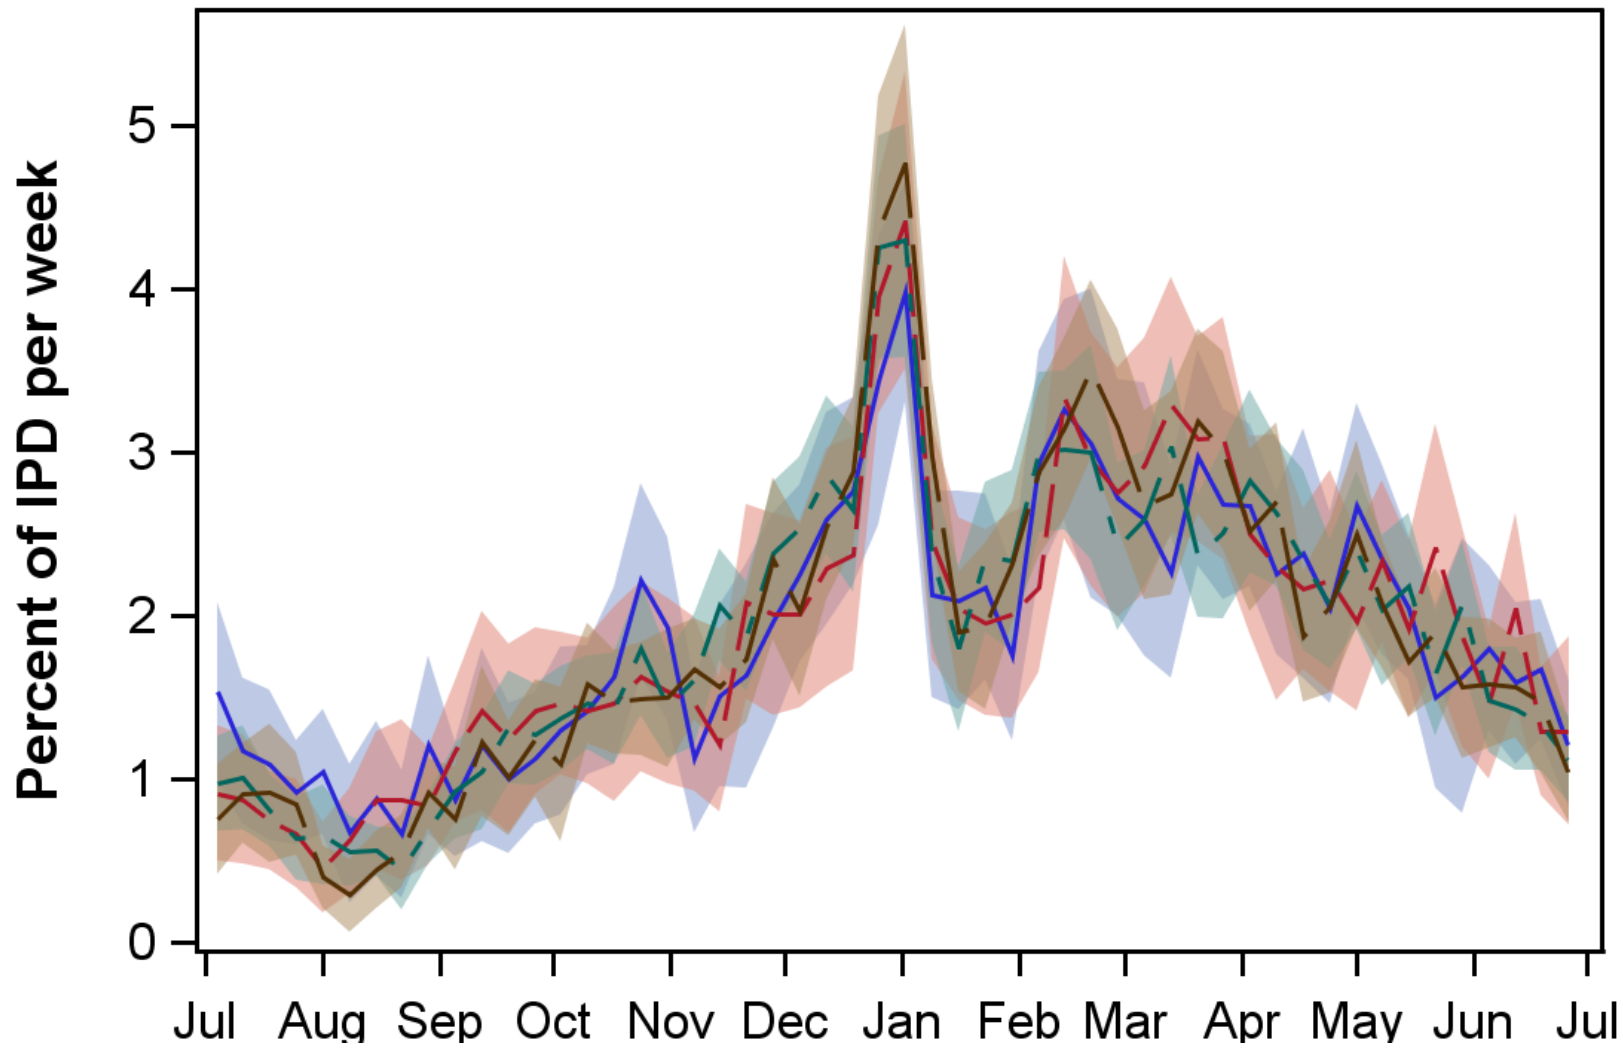

FIGURE S2

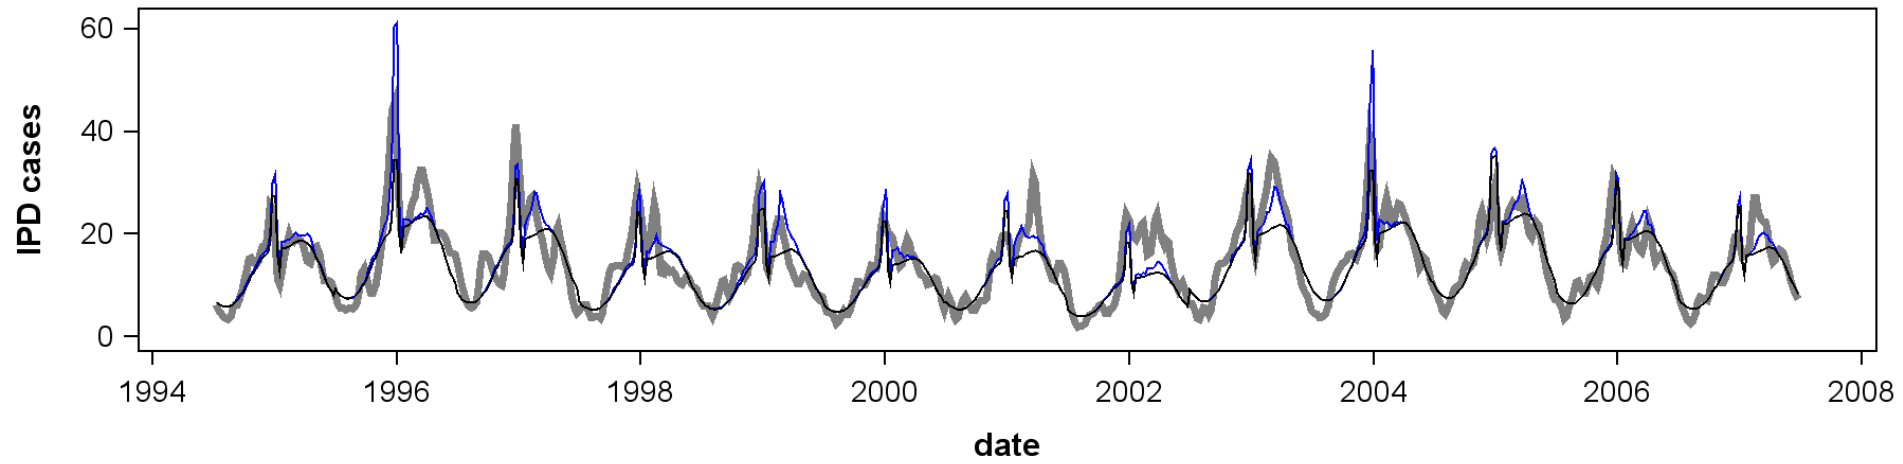

Supplement: supplementary_figures.pdf [file supplementary_figures.pdf]
